# Supplementary material for: The role and activity of various adsorbed ammonia species on Cu/SAPO-34 catalyst during passive-SCR process
Source: Royal Society of Chemistry journal article supplement (doi:10.1039/c4ra13984d), 2015-01-01
Supplement: c4ra13984d1.pdf [file c4ra13984d1.pdf]

## Supplementary information

### **The Role and Activity of Various Adsorbed Ammonia Species on Cu/SAPO-34 Catalyst during Passive-SCR Process**

Yingfeng Duan,<sup>a</sup> Jun Wang,<sup>a</sup> Tie Yu,<sup>a</sup> Meiqing Shen,<sup>\*a, b, c</sup> and Jianqiang Wang<sup>\*a</sup>

<sup>a</sup> Key Laboratory for Green Chemical Technology of State Education Ministry,  
School of Chemical Engineering & Technology, Tianjin University, Tianjin 300072, PR  
China

<sup>b</sup> Collaborative Innovation Center of Chemical Science and Engineering (Tianjin),  
Tianjin 300072, PR China

<sup>c</sup> State Key Laboratory of Engines, Tianjin University, Tianjin 300072, PR China

\* Corresponding author: Meiqing Shen, Jianqiang Wang

Postal address:

School of Chemical Engineering and Technology, Tianjin University, 92 Weijin Road,  
Nankai District, Tianjin 300072, China

Email: [jianqiangwang@tju.edu.cn](mailto:jianqiangwang@tju.edu.cn); [mqshen@tju.edu.cn](mailto:mqshen@tju.edu.cn)

Tel. /Fax. : (+86) 22-27407002

## 1. XRD results

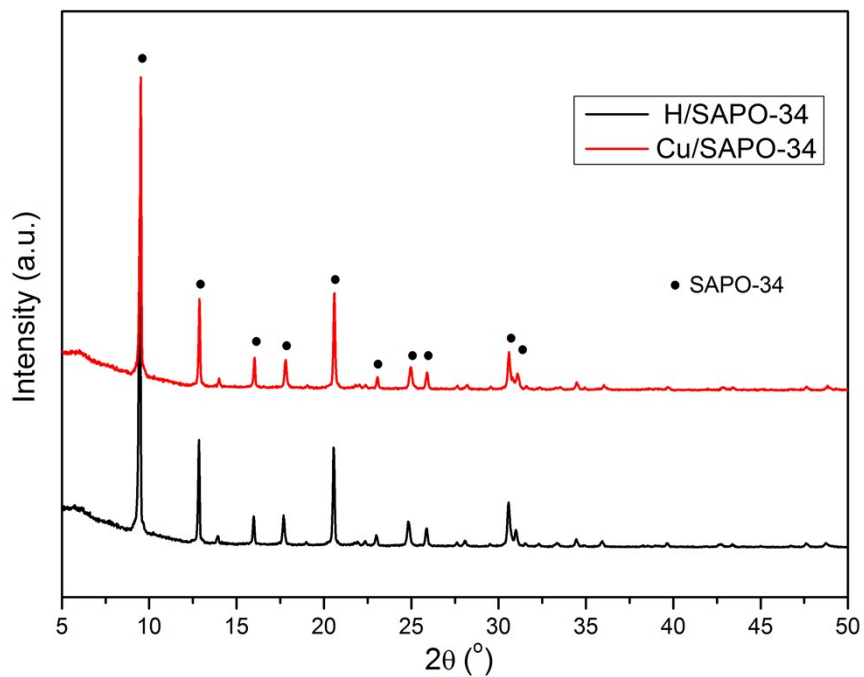

Fig. S1 XRD results of H/SAPO-34 support and Cu/SAPO-34 catalyst

## 2. ICP results

Table S1 ICP results of H/SAPO-34 support and Cu/SAPO-34 catalyst

| Sample     | Concentration (w.t. %) |     |      |     |
|------------|------------------------|-----|------|-----|
|            | Al                     | Si  | P    | Cu  |
| H/SAPO-34  | 21.6                   | 8.6 | 12.3 | -   |
| Cu/SAPO-34 | 21.4                   | 8.6 | 12.2 | 1.7 |

### 3. Blank experiments for reliability

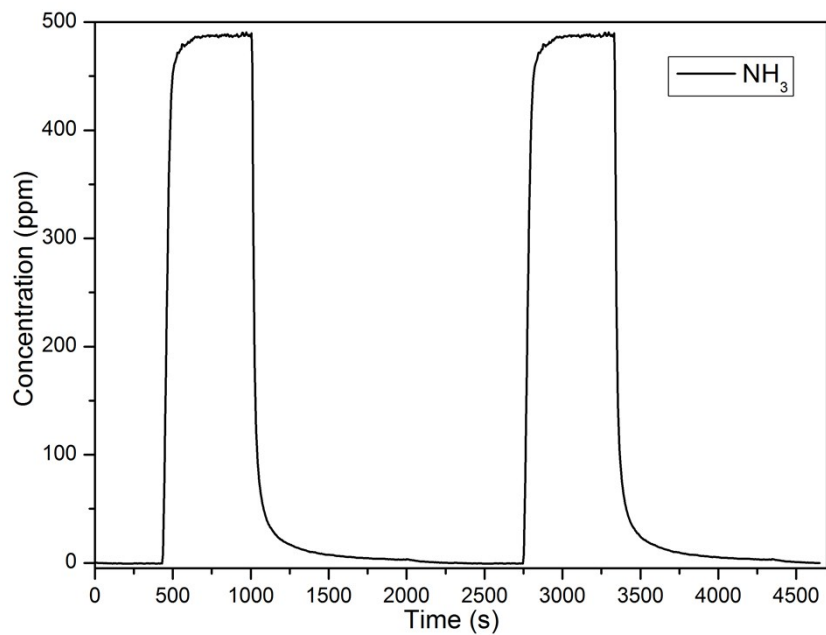

Fig. S2 blank experiment before adsorbed  $\text{NH}_3$  titration by  $\text{NO}+\text{O}_2$

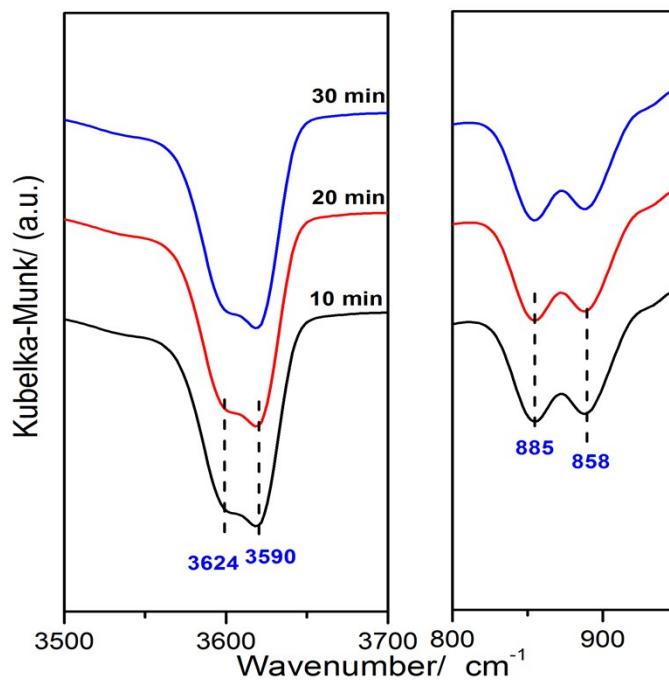

Fig. S3 DRIFTS spectra of Cu/SAPO-34 purged by Ar/He after  $\text{NH}_3$  saturation (10 min, 20 min and 30 min)
